# Supplementary material
Source: PubMed Central journal article supplement (PMC6368091)
Supplement: NIHMS1517827-supplement-7.pdf [file NIHMS1517827-supplement-7.pdf]

**Table S1.****A.**

| <b>COPD Subject Characteristics</b> | Entire cohort (n=21) | Never smoker (n=10) | COPD (n=11) | Point estimate (95% CI) | P-value |
|-------------------------------------|----------------------|---------------------|-------------|-------------------------|---------|
| Age, years                          | 58±8                 | 53±7                | 62±7        | 9 (2-16)                | 0.017   |
| Male sex                            | 9 (43%)              | 2 (20%)             | 7 (64%)     |                         | 0.080   |
| White race                          | 9 (43%)              | 4 (40%)             | 5 (46%)     |                         | 0.801   |
| Current smoker                      | 6 (29%)              | 0 (0%)              | 6 (55%)     |                         | 0.002   |
| Pack-year                           | 20±37                | 0.1±0.3             | 41.6±44.7   | 41.5 (7.1-75.8)         | 0.024   |
| FEV1, percent predicted             | 80±21                | 100±11              | 65±11       | -35 (-47 – -25)         | <0.001  |
| FVC, percent predicted              | 91±13                | 97±11               | 88±13       | -9 (-21 – 3)            | 0.130   |

Data expressed as mean ±S.D. or n (%). Independent t-test, Chi square, or Fisher's exact used for analysis between the diseased and Control cohorts.

**B.**

| <b>BPD Subject Characteristics</b>       | Entire cohort (n=10) | Non-BPD (n=5) | BPD (n=5)    | P-Value |
|------------------------------------------|----------------------|---------------|--------------|---------|
| Gestational Age (weeks), mean (+/- S.D.) | 31.5±6.5             | 37.4 ±2.3     | 26 ± 1.9     | <0.0001 |
| Birth weight (grams), mean +/- S.D.      | 1974±1367            | 3246 ± 406    | 713 ± 193    | <0.0001 |
| Male sex, no. (%)                        | 7 (70%)              | 4 (80%)       | 3 (60%)      | >0.99   |
| Race                                     |                      |               |              |         |
| Black, no. (%)                           | 2 (40%)              | 2 (40%)       | 0 (0%)       | 0.04    |
| Caucasian, no. (%)                       | 7 (70%)              | 2 (40%)       | 5 (100%)     | 0.04    |
| Antenatal corticosteroids no., (%)       | 3 (30%)              | 1 (20%)       | 2 (40%)      | 0.41    |
| Chorioamnionitis, no. (%)                | 2 (20%)              | 0 (0%)        | 2 (40%)      | 0.14    |
| Rupture of Membranes >18hrs, no. (%)     | 3 (30%)              | 2 (40%)       | 1 (20%)      | 0.54    |
| Preeclampsia, no. (%)                    | 1 (10%)              | 1 (20%)       | 0 (0%)       | 0.35    |
| Intrauterine growth restriction          | 0 (0%)               | 0 (0%)        | 0 (0%)       | >0.99   |
| Intubation in delivery room, no. (%)     | 6 (60%)              | 2 (40%)       | 4 (80%)      | 0.24    |
| High-frequency ventilation, no. (%)      | 2 (20%)              | 1 (20%)       | 1 (20%)      | >0.99   |
| Ventilator days, mean (range)            | 54.3 (1-195)         | 5.6 (1-12)    | 103 (20-195) | 0.02    |
| In-hospital death, no. (%)               | 4 (40%)              | 0 (0%)        | 4 (80%)      | 0.048   |

Data expressed as mean ±S.D., n (%), or mean (range). Independent t-test, Chi square, or Fisher's exact used for analysis between the diseased and control cohorts.
