# Supplementary material
Source: PubMed Central journal article supplement (PMC6368091)

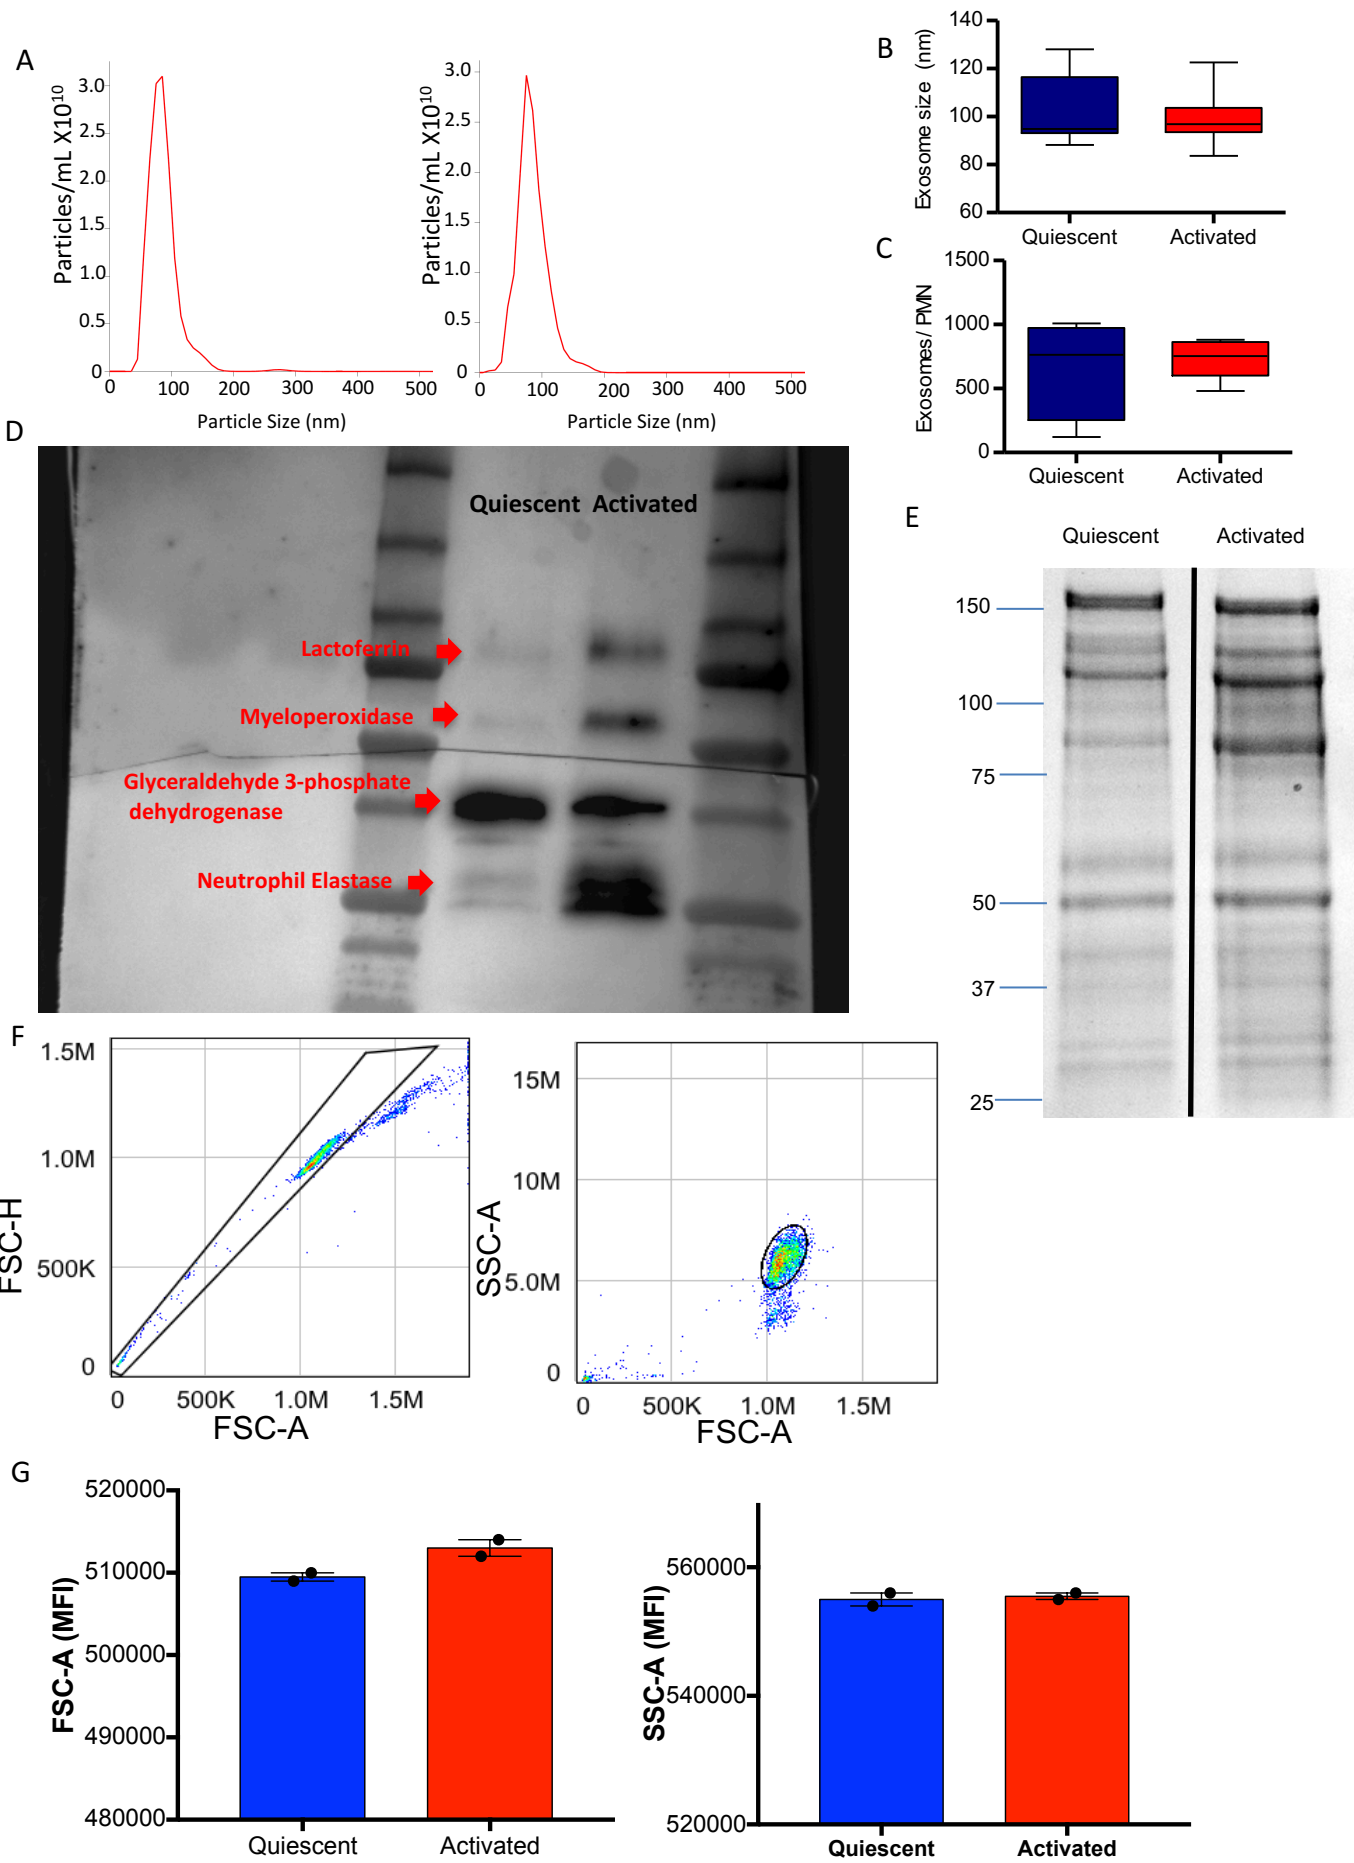

Figure S1

Supplement: NIHMS1517827-supplement-1.pdf [file NIHMS1517827-supplement-1.pdf]

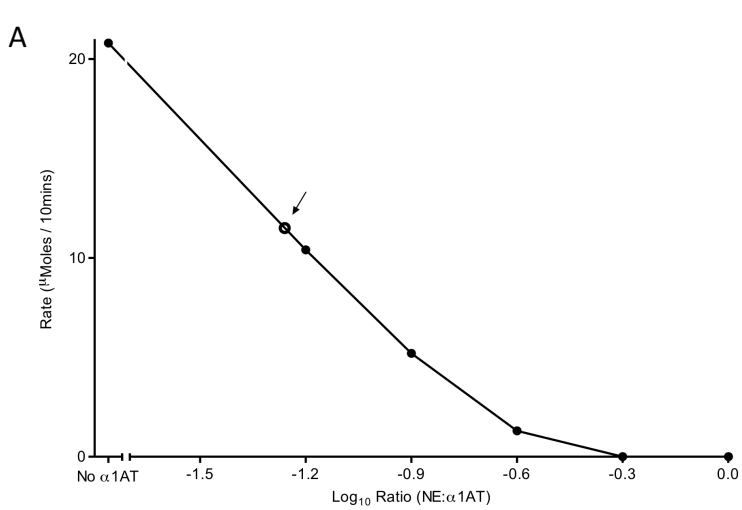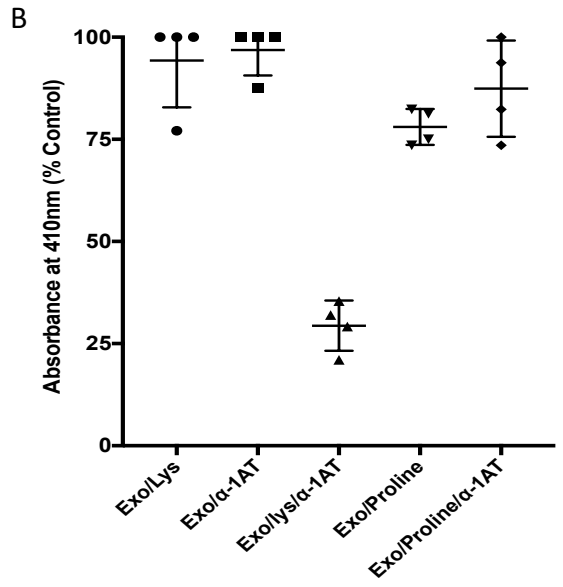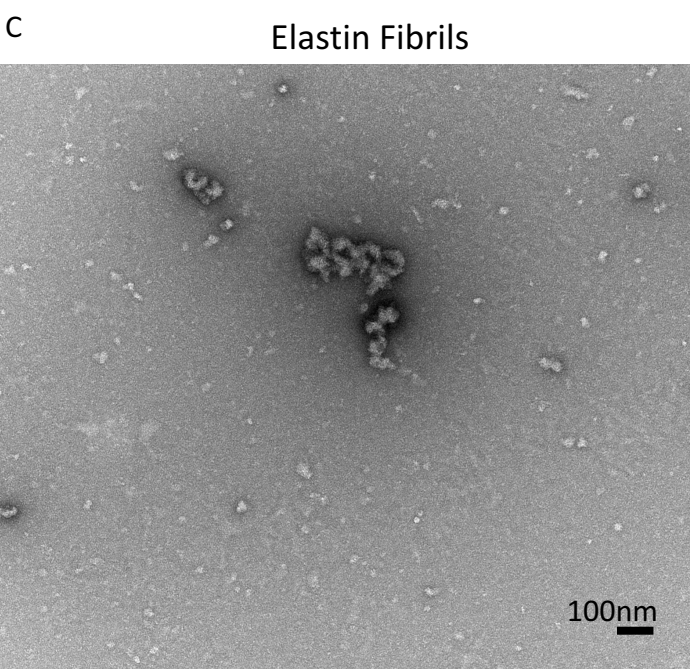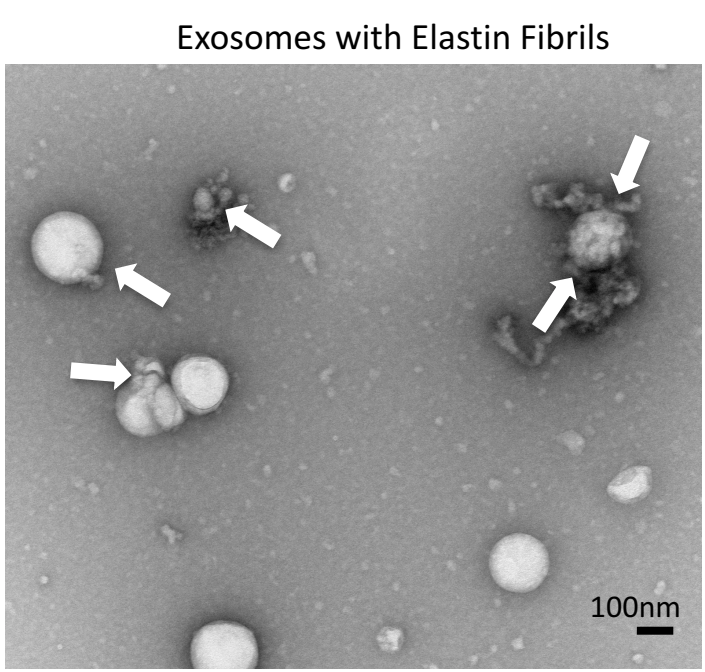

**Figure S2.**

Supplement: NIHMS1517827-supplement-2.pdf [file NIHMS1517827-supplement-2.pdf]

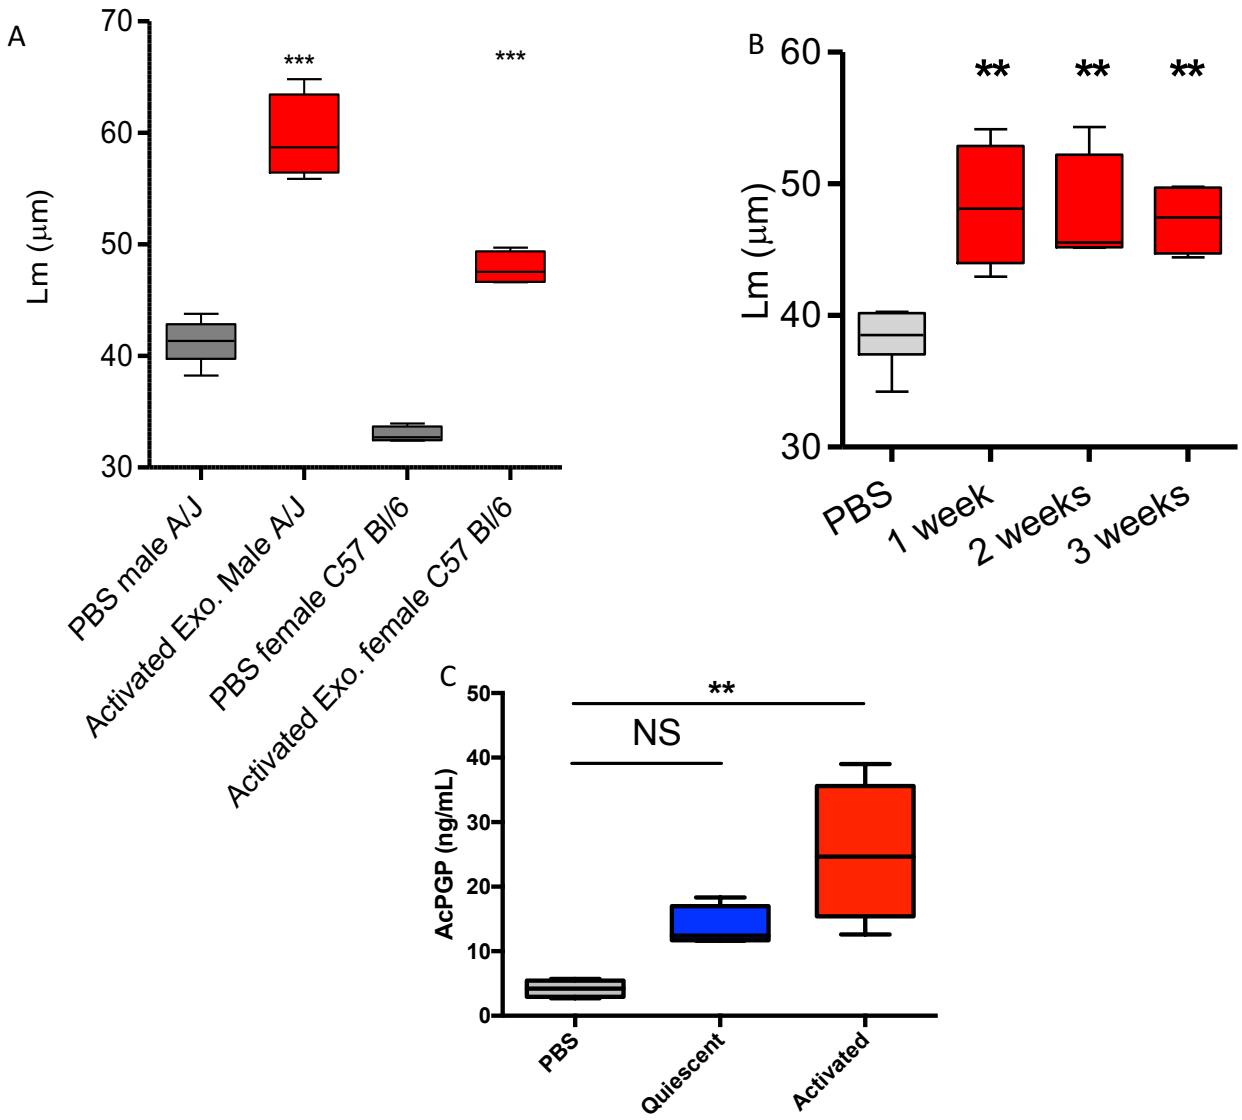

Figure S3.

Supplement: NIHMS1517827-supplement-3.pdf [file NIHMS1517827-supplement-3.pdf]

A.

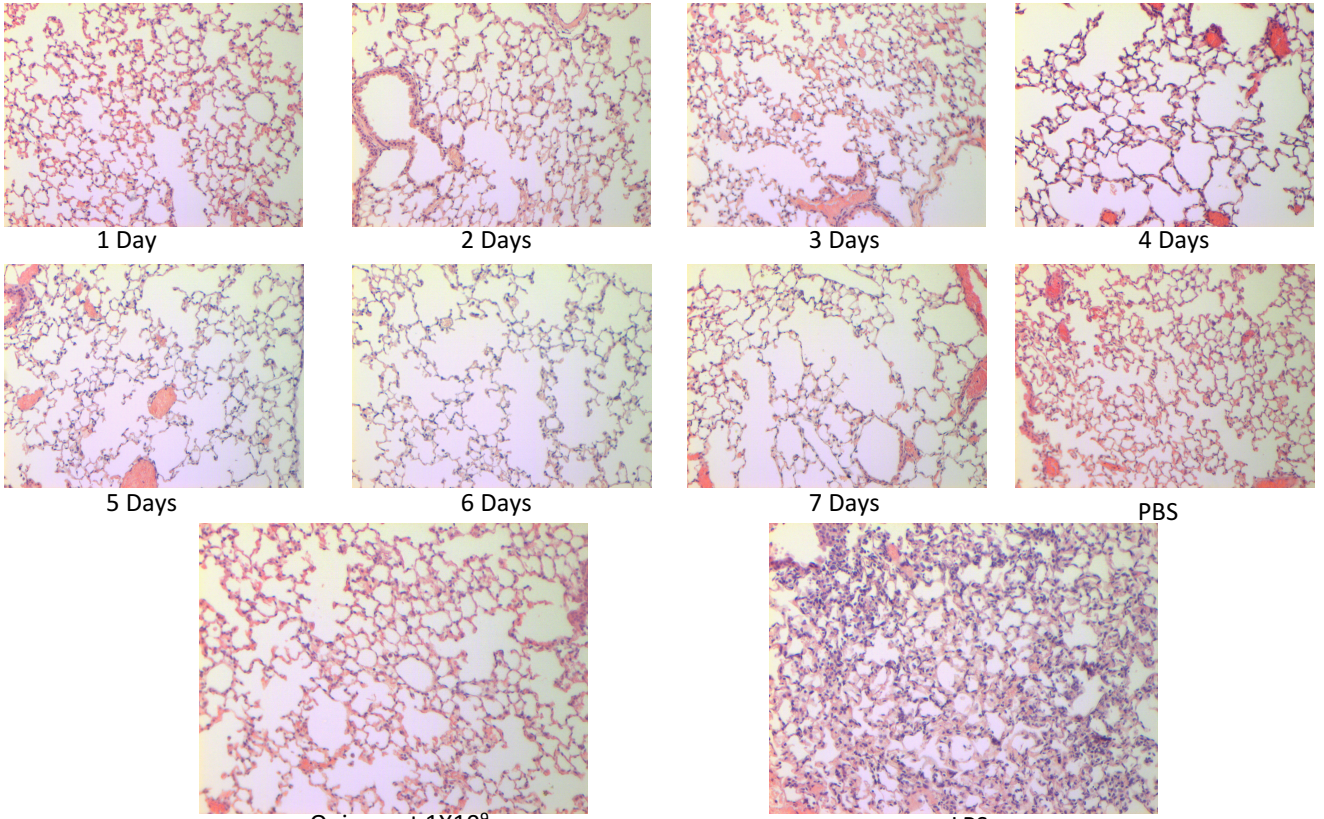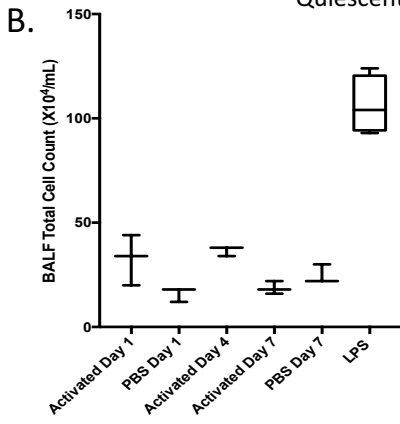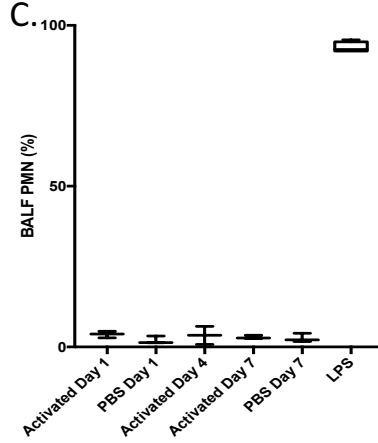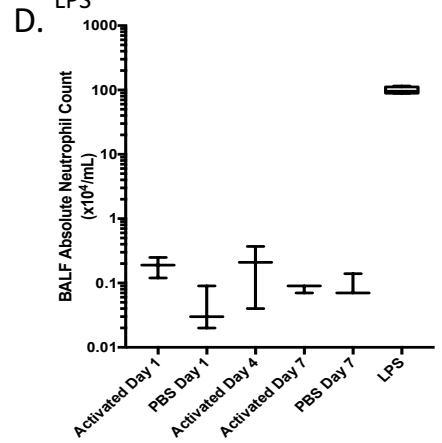

Figure S4.

Supplement: NIHMS1517827-supplement-4.pdf [file NIHMS1517827-supplement-4.pdf]

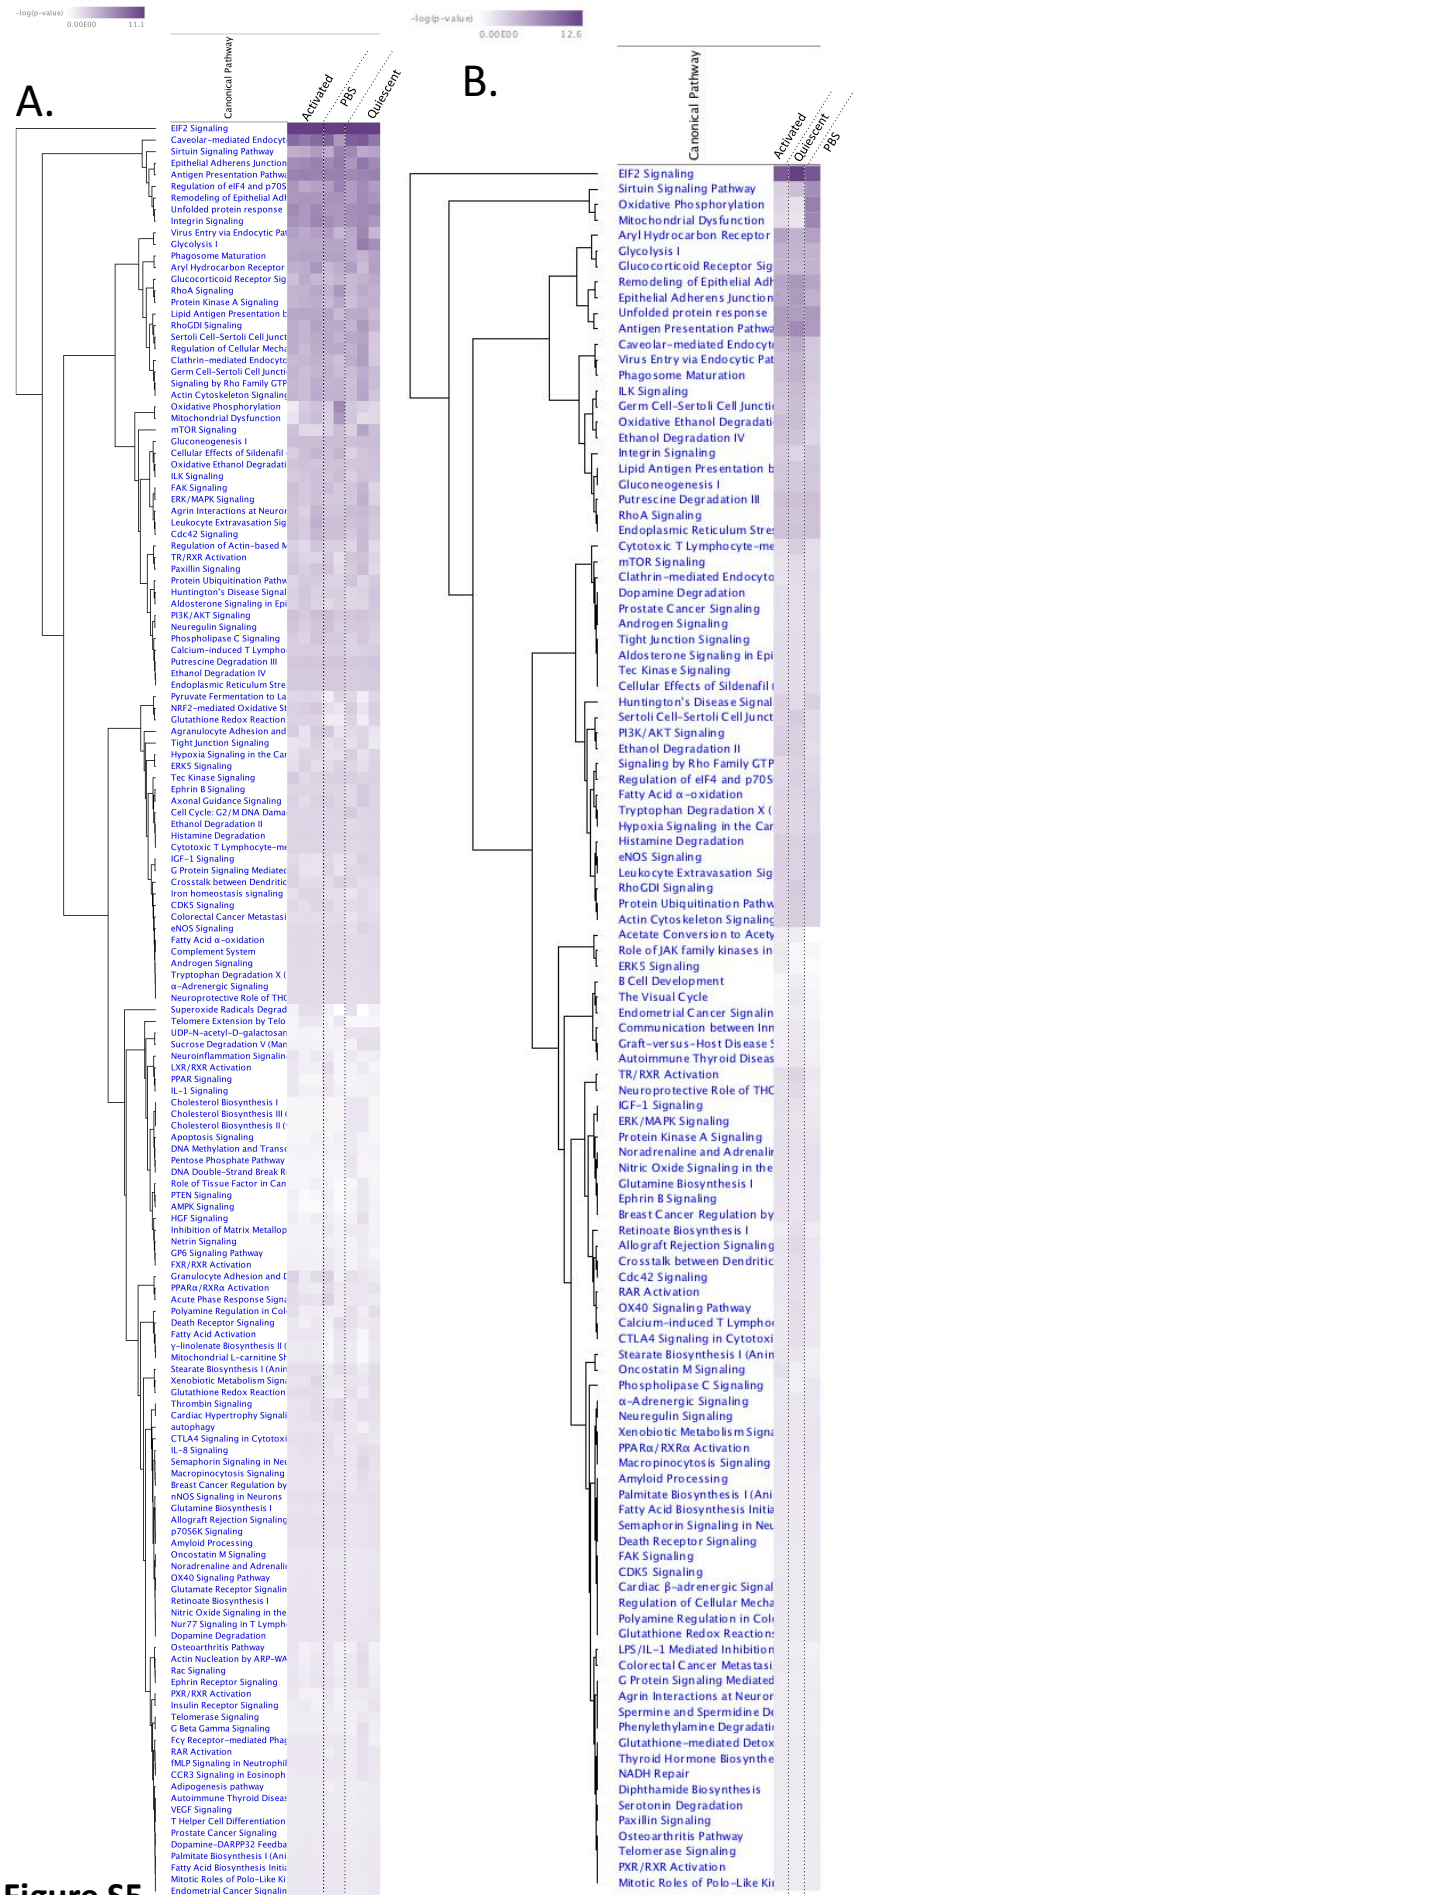

Figure S5

Supplement: NIHMS1517827-supplement-5.pdf [file NIHMS1517827-supplement-5.pdf]

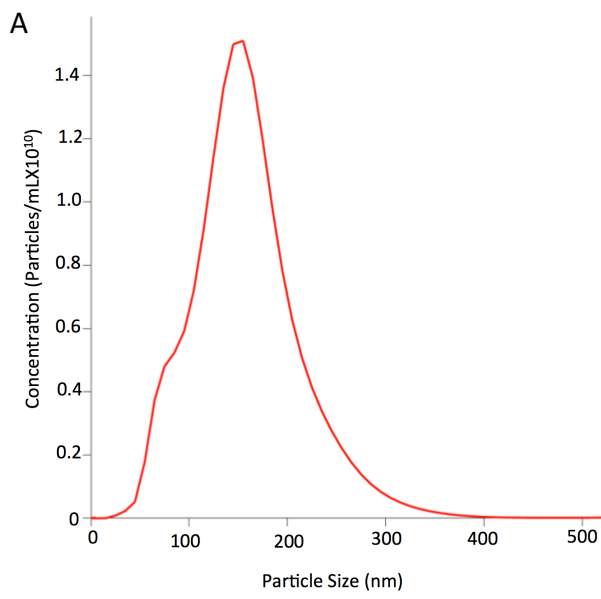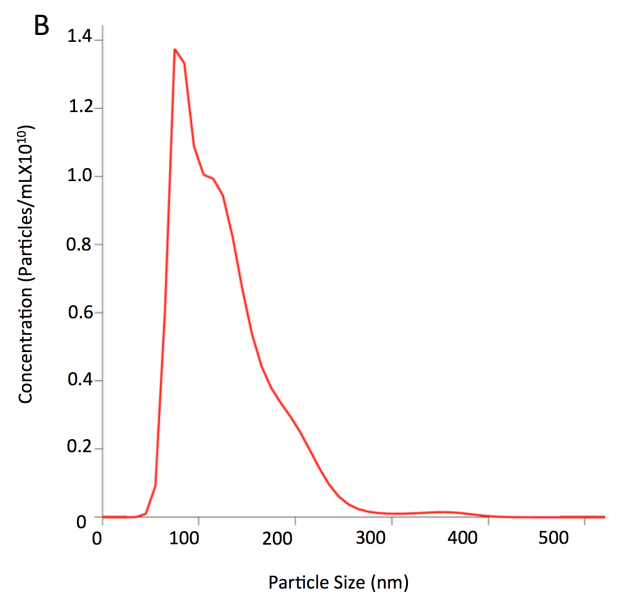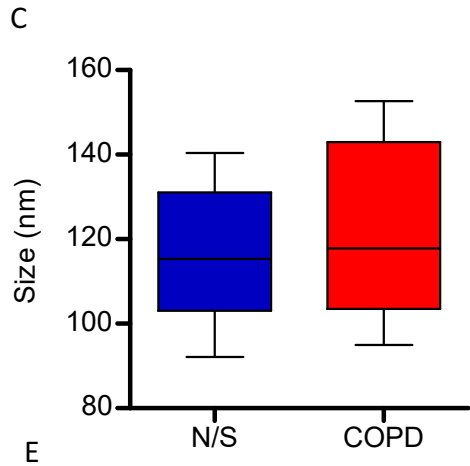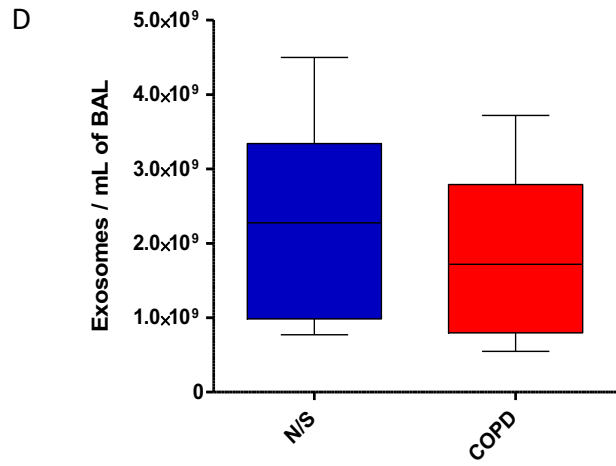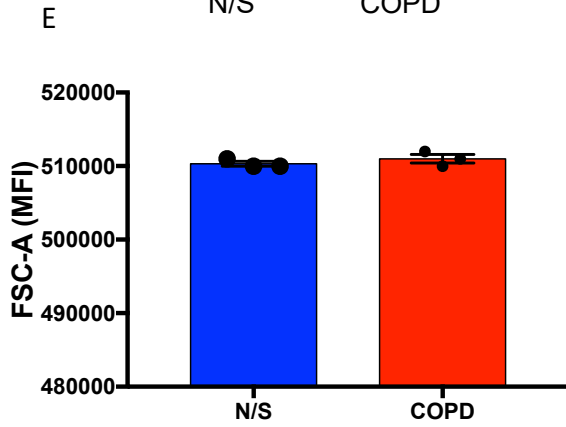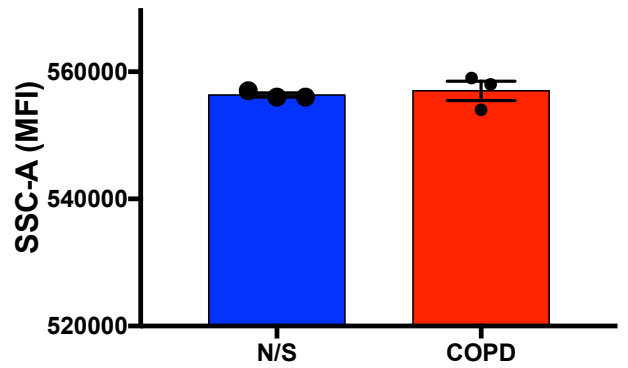

**Figure S6**

Supplement: NIHMS1517827-supplement-6.pdf [file NIHMS1517827-supplement-6.pdf]
